# Supplementary material for: The Impact of the Synergistic Effect of Temperature and Air Pollutants on Chronic Lung Diseases in Subtropical Taiwan
Source: MDPI journal article supplement (doi:10.3390/jpm11080819), 2021-08-21
Supplement: s1 [file s1]

**Table S1. Multiple comparison tests (post hoc analysis)**

|                                     | Normal<br>Spirometry(1) | Obstructive<br>Impairment(2) | Restrictive<br>Impairment(3) | Mixed<br>Impairment(4) | Overall<br>P-value | 2 vs 1<br>P-value | 3 vs 1<br>P-value | 4 vs 1<br>P-value |
|-------------------------------------|-------------------------|------------------------------|------------------------------|------------------------|--------------------|-------------------|-------------------|-------------------|
| n                                   | 1902                    | 733                          | 154                          | 100                    |                    |                   |                   |                   |
| Age (years), mean (SD)              | 49.51 (10.46)           | 50.56(10.68)                 | 52.61 (11.02)                | 55.31 (11.25)          | <0.0001            | 0.0664            | 0.0014            | 0.0000            |
| 30-39                               | 438 (23.00)             | 149 (20.30)                  | 26 (16.90)                   | 15 (15.00)             |                    |                   |                   |                   |
| 40-49                               | 524 (27.50)             | 186 (25.40)                  | 37 (24.00)                   | 13 (13.00)             |                    |                   |                   |                   |
| 40-59                               | 585 (30.80)             | 231 (31.50)                  | 49 (31.80)                   | 26 (26.00)             |                    |                   |                   |                   |
| ≥60                                 | 355 (18.70)             | 167 (22.80)                  | 42 (27.30)                   | 46 (46.00)             | <0.0001            | 0.0115            | 0.0115            | <0.0001           |
| Only ≥60                            |                         |                              |                              |                        |                    | 0.5530            | 0.5530            | 0.0001            |
| Sex, n (%)                          |                         |                              |                              |                        |                    |                   |                   |                   |
| Male                                | 903 (47.50)             | 322 (43.90)                  | 66 (42.90)                   | 32 (32.00)             |                    |                   |                   |                   |
| Female                              | 999 (52.50)             | 411 (56.10)                  | 88 (57.10)                   | 68 (68.00)             | 0.0098             | 0.2039            | 0.2699            | 0.0087            |
| Anthropometric parameter, mean (SD) |                         |                              |                              |                        |                    |                   |                   |                   |
| Height (cm)                         | 163.09 (8.32)           | 162.52 (8.05)                | 160.26 (7.57)                | 158.28 (7.80)          | <0.0001            | 0.3271            | 0.0001            | <0.0001           |
| Weight (kg)                         | 64.49 (12.22)           | 64.08 (11.60)                | 62.74 (12.94)                | 58.82 (10.67)          | <0.0001            | 1.0000            | 0.2485            | <0.0001           |
| Body Adiposity Index                | 28.40 (3.92)            | 28.75 (3.79)                 | 29.62 (4.38)                 | 29.72 (3.79)           | <0.0001            | 0.1140            | 0.0006            | 0.0031            |
| Body Roundness Index                | 3.70 (1.12)             | 3.74 (1.08)                  | 3.96 (1.38)                  | 3.70 (1.20)            | 0.0475             | 1.0000            | 0.0163            | 1.0000            |
| Biochemical data, mean (SD)         |                         |                              |                              |                        |                    |                   |                   |                   |
| Hematocrit (%)                      | 44.32 (4.64)            | 43.86 (4.61)                 | 44.13 (4.52)                 | 43.10 (3.86)           | 0.0139             | 0.0674            | 1.0000            | 0.0291            |
| Glycohemoglobin (%)                 | 5.73 (0.71)             | 5.84 (0.90)                  | 6.00 (1.13)                  | 5.82 (0.73)            | <0.0001            | 0.0033            | 0.0001            | 0.7781            |
| Albumin (g/dL)                      | 4.60 (0.24)             | 4.6 (0.24)                   | 4.56 (0.25)                  | 4.54 (0.24)            | 0.0241             | 1.0000            | 0.1620            | 0.0371            |
| Diabetes mellitus type 2            | 77 (4.00)               | 43 (5.90)                    | 12 (7.80)                    | 6 (6.00)               | 0.0474             | 0.0935            | 0.0935            | 0.3433            |

Continuous variables of data were estimated by using the generalized linear regression model. Multiple comparison tests were calculated by using Bonferroni adjustment.

Discrete variables of data were estimated by using the logistic regression model. Multiple comparison tests were calculated by using the MULTTEST procedure, a Bonferroni correction.

**Table S2. Descriptive statistics of air pollutants and meteorological factors**

|                                        | N    | mean  | SD    | Median | Q1    | Q3    | Max    | Min   |
|----------------------------------------|------|-------|-------|--------|-------|-------|--------|-------|
| Temperature ( °C)                      | 2889 | 24.33 | 0.77  | 24.41  | 23.96 | 24.83 | 26.36  | 21.46 |
| Relative humidity (%)                  | 2889 | 74.29 | 2.45  | 74.51  | 72.33 | 75.71 | 83.65  | 68.35 |
| Rainfall (mm/day)                      | 2889 | 0.22  | 0.05  | 0.21   | 0.19  | 0.25  | 0.38   | 0.06  |
| PM <sub>10</sub> (µg/m <sup>3</sup> )  | 2889 | 68.07 | 17.06 | 70.54  | 58.16 | 79.41 | 117.62 | 27.79 |
| PM <sub>2.5</sub> (µg/m <sup>3</sup> ) | 2889 | 37.65 | 10.74 | 38.75  | 32.62 | 43.14 | 89.51  | 12.94 |
| CO (ppm)                               | 2889 | 0.45  | 0.18  | 0.46   | 0.36  | 0.48  | 1.06   | 0.15  |
| NO (ppb)                               | 2889 | 4.18  | 4.01  | 3.25   | 2.31  | 4.1   | 20.11  | 0.97  |
| NO <sub>2</sub> (ppb)                  | 2889 | 14.98 | 5.65  | 15.8   | 13.3  | 17.26 | 27.24  | 1.26  |
| NO <sub>x</sub> (ppb)                  | 2889 | 19.14 | 8.93  | 19.23  | 16.24 | 21.05 | 47.01  | 2.24  |
| O <sub>3</sub> (ppb)                   | 2889 | 30.91 | 3.86  | 30.49  | 28.28 | 33.21 | 43.7   | 21    |
| SO <sub>2</sub> (ppb)                  | 2889 | 3.66  | 1.2   | 3.59   | 3.1   | 4.1   | 8.7    | 1.01  |

SD: Standard deviation; CO: Carbon monoxide; NO: Nitrogen monoxide; NO<sub>2</sub>: Nitrogen dioxide; NO<sub>x</sub>: Nitrogen oxides; O<sub>3</sub>: Ozone; SO<sub>2</sub>: Sulfur dioxide; PM<sub>10</sub>: coarse particulate matter; PM<sub>2.5</sub>: fine particulate matter

**Table S3. Pearson product-moment correlations to measure the relationships between air pollutants**

|                   | Temperature | Relative Humidity | Rainfall | PM <sub>10</sub> | PM <sub>2.5</sub> | CO      | NO      | NO <sub>2</sub> | NO <sub>x</sub> | O <sub>3</sub> | SO <sub>2</sub> |
|-------------------|-------------|-------------------|----------|------------------|-------------------|---------|---------|-----------------|-----------------|----------------|-----------------|
| Temperature       | 1.00        | <0.0001           | <0.0001  | <0.0001          | <0.0001           | <0.0001 | <0.0001 | <0.0001         | <0.0001         | <0.0001        | <0.0001         |
| Relative humidity | -0.14       | 1.00              | <0.0001  | <0.0001          | <0.0001           | <0.0001 | <0.0001 | <0.0001         | <0.0001         | <0.0001        | <0.0001         |
| Rainfall          | -0.35       | -0.19             | 1.00     | <0.0001          | <0.0001           | <0.0001 | <0.0001 | <0.0001         | <0.0001         | <0.0001        | <0.0001         |
| PM <sub>10</sub>  | 0.21        | -0.35             | 0.13     | 1.00             | <0.0001           | <0.0001 | 0.2792  | <0.0001         | <0.0001         | <0.0001        | <0.0001         |
| PM <sub>2.5</sub> | 0.31        | -0.34             | 0.08     | 0.66             | 1.00              | <0.0001 | <0.0001 | <0.0001         | <0.0001         | <0.0001        | <0.0001         |
| CO                | -0.30       | -0.29             | 0.38     | 0.20             | 0.16              | 1.00    | <0.0001 | <0.0001         | <0.0001         | <0.0001        | <0.0001         |
| NO                | -0.49       | -0.09             | 0.30     | -0.02            | -0.13             | 0.89    | 1.00    | <0.0001         | <0.0001         | <0.0001        | <0.0001         |
| NO <sub>2</sub>   | -0.17       | -0.42             | 0.33     | 0.41             | 0.42              | 0.89    | 0.71    | 1.00            | <0.0001         | <0.0001        | <0.0001         |
| NO <sub>x</sub>   | -0.32       | -0.31             | 0.34     | 0.25             | 0.20              | 0.96    | 0.89    | 0.95            | 1.00            | <0.0001        | <0.0001         |
| O <sub>3</sub>    | 0.34        | 0.37              | -0.44    | -0.28            | -0.11             | -0.74   | -0.67   | -0.79           | -0.80           | 1.00           | <0.0001         |
| SO <sub>2</sub>   | 0.12        | -0.31             | 0.21     | 0.51             | 0.51              | 0.64    | 0.41    | 0.79            | 0.68            | -0.52          | 1.00            |

PM<sub>10</sub>: coarse particulate matter; PM<sub>2.5</sub>: fine particulate matter; CO: Carbon monoxide; NO: Nitrogen monoxide; NO<sub>2</sub>: Nitrogen dioxide; NO<sub>x</sub>: Nitrogen oxides; O<sub>3</sub>: Ozone; SO<sub>2</sub>: Sulfur dioxide;

**Table S4. Multinomial logistic regression analysis**

|                           | Obstructive vs Normal |         | Restrictive vs Normal |         | Mixed vs Normal        |         |
|---------------------------|-----------------------|---------|-----------------------|---------|------------------------|---------|
|                           | Crude OR (95% CI)     | P       | Crude OR (95% CI)     | P       | Crude OR (95% CI)      | P       |
| Age                       | 1.01 (1–1.02)         | 0.0229  | 1.03 (1.01–1.04)      | 0.0005  | 1.06 (1.03–1.08)       | <0.0001 |
| Age groups (years)        |                       |         |                       |         |                        |         |
| 30–39                     | 1.00                  |         | 1.00                  |         | 1.00                   |         |
| 40–49                     | 1.04 (0.81–1.34)      | 0.7389  | 1.19 (0.71–2.00)      | 0.5109  | 0.72 (0.34–1.54)       | 0.4017  |
| 40–59                     | 1.16 (0.91–1.48)      | 0.2240  | 1.41 (0.86–2.31)      | 0.1696  | 1.30 (0.68–2.48)       | 0.4301  |
| ≥60                       | 1.38 (1.06–1.80)      | 0.0151  | 1.99 (1.20–3.31)      | 0.0079  | 3.78 (2.08–6.89)       | <0.0001 |
| Gender                    |                       |         |                       |         |                        |         |
| Male                      | 1.00                  |         | 1.00                  |         | 1.00                   |         |
| Female                    | 1.15 (0.97–1.37)      | 0.1020  | 1.21 (0.87–1.68)      | 0.2699  | 1.92 (1.25–2.95)       | 0.0029  |
| Anthropometric parameters |                       |         |                       |         |                        |         |
| Height                    | 0.99 (0.98–1.00)      | 0.1116  | 0.96 (0.94–0.98)      | <0.0001 | 0.92 (0.90–0.95)       | <0.0001 |
| Weight                    | 1.00 (0.99–1.00)      | 0.4364  | 0.99 (0.97–1.00)      | 0.0856  | 0.95 (0.94–0.97)       | <0.0001 |
| Body Adiposity Index      | 1.02 (1.00–1.05)      | 0.0368  | 1.08 (1.04–1.12)      | 0.0002  | 1.08 (1.03–1.14)       | 0.0009  |
| Body Roundness Index      | 1.03 (0.96–1.11)      | 0.4228  | 1.21 (1.06–1.38)      | 0.0054  | 1.00 (0.83–1.20)       | 0.9863  |
| Biochemical data          |                       |         |                       |         |                        |         |
| Hematocrit                | 0.98 (0.96–0.99)      | 0.0227  | 0.99 (0.96–1.03)      | 0.6305  | 0.94 (0.90–0.99)       | 0.0096  |
| Glycohemoglobin           | 1.20 (1.08–1.33)      | 0.0008  | 1.38 (1.19–1.61)      | <0.0001 | 1.17 (0.92–1.48)       | 0.2038  |
| Albumin                   | 0.94 (0.66–1.34)      | 0.7304  | 0.51 (0.25–1.01)      | 0.0539  | 0.34 (0.15–0.79)       | 0.0122  |
| Creatinine                | 0.80 (0.58–1.10)      | 0.1754  | 0.41 (0.17–0.99)      | 0.0466  | 0.10 (0.03–0.34)       | 0.0002  |
| Comorbidities             |                       |         |                       |         |                        |         |
| Diabetes mellitus type 2  | 1.48 (1.01–2.17)      | 0.0461  | 2.00 (1.06–3.77)      | 0.0312  | 1.51 (0.64–3.56)       | 0.3433  |
| Monitoring region         |                       |         |                       |         |                        |         |
| Northern region           | 1.00                  |         | 1.00                  |         | 1.00                   |         |
| Central region            | 0.61 (0.47–0.80)      | 0.0003  | 0.47 (0.27–0.82)      | 0.0075  | 0.16 (0.07–0.34)       | <0.0001 |
| Southern region           | 0.59 (0.48–0.73)      | <0.0001 | 0.70 (0.47–1.05)      | 0.0829  | 0.32 (0.21–0.50)       | <0.0001 |
| Meteorological factors    |                       |         |                       |         |                        |         |
| Temperature               | 1.19 (1.07–1.34)      | 0.0022  | 1.10 (0.89–1.37)      | 0.3726  | 0.83 (0.65–1.06)       | 0.1285  |
| Relative humidity         | 1.05 (1.02–1.09)      | 0.0029  | 1.00 (0.94–1.07)      | 0.8937  | 1.06 (0.98–1.15)       | 0.1332  |
| Rainfall                  | 0.08 (0.01–0.44)      | 0.0038  | 16.15 (0.64–404.91)   | 0.0905  | 241.56 (4.81–12134.04) | 0.0060  |
| Air pollutants            |                       |         |                       |         |                        |         |
| PM <sub>10</sub>          | 0.99 (0.98–0.99)      | <0.0001 | 1.00 (0.99–1.01)      | 0.6971  | 0.99 (0.98–1.00)       | 0.0742  |
| PM <sub>2.5</sub>         | 0.98 (0.97–0.99)      | <0.0001 | 1.00 (0.98–1.01)      | 0.9357  | 0.97 (0.95–0.98)       | 0.0002  |
| CO                        | 1.29 (0.80–2.07)      | 0.3019  | 3.21 (1.44–7.18)      | 0.0044  | 9.11 (3.90–21.3)       | <0.0001 |
| NO                        | 1.02 (0.99–1.04)      | 0.0686  | 1.03 (0.99–1.07)      | 0.1501  | 1.09 (1.06–1.13)       | <0.0001 |
| NO <sub>2</sub>           | 1.00 (0.98–1.01)      | 0.5917  | 1.03 (0.99–1.06)      | 0.0642  | 1.07 (1.03–1.11)       | 0.0005  |
| NO <sub>x</sub>           | 1.00 (0.99–1.01)      | 0.6450  | 1.02 (0.99–1.03)      | 0.0709  | 1.04 (1.03–1.06)       | <0.0001 |
| O <sub>3</sub>            | 1.01 (0.98–1.03)      | 0.5472  | 0.98 (0.94–1.03)      | 0.4648  | 0.91 (0.86–0.96)       | 0.0004  |
| SO <sub>2</sub>           | 1.07 (0.99–1.14)      | 0.0820  | 1.16 (1.01–1.33)      | 0.0318  | 1.30 (1.11–1.52)       | 0.0013  |

PM<sub>10</sub>: coarse particulate matter; PM<sub>2.5</sub>: fine particulate matter; CO: Carbon monoxide; NO: Nitrogen monoxide; NO<sub>2</sub>: Nitrogen dioxide; NO<sub>x</sub>: Nitrogen oxides; O<sub>3</sub>: Ozone; SO<sub>2</sub>: Sulfur dioxide

**Table S5. Interaction terms (cross-product terms)**

| Interaction terms                         | Obstructive vs Normal |         | Restrictive vs Normal |         | Mixed vs Normal |         |
|-------------------------------------------|-----------------------|---------|-----------------------|---------|-----------------|---------|
|                                           | $\beta$ (SE)          | P       | $\beta$ (SE)          | P       | $\beta$ (SE)    | P       |
| Temperature by monitoring region          | 0.82 (0.14)           | <0.0001 | 1.38 (0.26)           | <0.0001 | 1.66(0.32)      | <0.0001 |
| Meteorological by air pollution factor    |                       |         |                       |         |                 |         |
| Temperature by PM <sub>10</sub>           | 0.01 (0.00)           | 0.0045  | 0.00 (0.01)           | 0.7818  | 0.01 (0.01)     | 0.4108  |
| Temperature by PM <sub>2.5</sub>          | 0.02 (0.01)           | 0.0065  | 0.03 (0.01)           | 0.0062  | 0.06 (0.01)     | 0.0002  |
| Temperature by CO                         | -0.66 (0.28)          | 0.0191  | 0.34 (0.53)           | 0.5176  | -0.93 (0.67)    | 0.1634  |
| Temperature by NO                         | -0.02 (0.02)          | 0.2386  | -0.08 (0.04)          | 0.0200  | -0.05 (0.04)    | 0.2079  |
| Temperature by NO <sub>2</sub>            | -0.02 (0.01)          | 0.0195  | -0.03 (0.02)          | 0.1320  | -0.06 (0.02)    | 0.0102  |
| Temperature by NO <sub>x</sub>            | -0.02 (0.01)          | 0.0032  | -0.02 (0.01)          | 0.1236  | -0.03 (0.01)    | 0.0384  |
| Temperature by O <sub>3</sub>             | 0.04 (0.02)           | 0.0085  | 0.07 (0.03)           | 0.0144  | 0.11 (0.03)     | 0.0012  |
| Temperature by SO <sub>2</sub>            | 0.04 (0.04)           | 0.3124  | -0.11 (0.09)          | 0.1964  | -0.12 (0.10)    | 0.2269  |
| Monitoring region by air pollution factor |                       |         |                       |         |                 |         |
| Monitoring region by PM <sub>10</sub>     | 0.00 (0.00)           | 0.9475  | -0.02 (0.01)          | 0.0103  | 0.00 (0.01)     | 0.8603  |
| Monitoring region by PM <sub>2.5</sub>    | 0.00 (0.01)           | 0.7723  | -0.01 (0.01)          | 0.5219  | 0.00 (0.01)     | 0.8597  |
| Monitoring region by CO                   | 1.33 (0.37)           | 0.0003  | 1.64 (0.64)           | 0.0107  | 1.88 (0.82)     | 0.0219  |
| Monitoring region by NO                   | 0.07 (0.03)           | 0.0129  | -0.11 (0.06)          | 0.0391  | 0.02 (0.07)     | 0.7354  |
| Monitoring region by NO <sub>2</sub>      | 0.04 (0.01)           | <0.0001 | 0.01 (0.02)           | 0.5828  | 0.06 (0.02)     | 0.0128  |
| Monitoring region by NO <sub>x</sub>      | 0.03 (0.01)           | 0.0002  | 0.00 (0.01)           | 0.9749  | 0.04 (0.02)     | 0.0301  |
| Monitoring region by O <sub>3</sub>       | 0.00 (0.01)           | 0.7198  | 0.04 (0.02)           | 0.1020  | 0.02 (0.03)     | 0.4392  |
| Monitoring region by SO <sub>2</sub>      | 0.24 (0.04)           | <0.0001 | 0.02 (0.08)           | 0.8167  | 0.17 (0.08)     | 0.0314  |

SE: Standard error; CO: Carbon monoxide; NO: Nitrogen monoxide; NO<sub>2</sub>: Nitrogen dioxide; NO<sub>x</sub>: Nitrogen oxides; O<sub>3</sub>: Ozone; SO<sub>2</sub>: Sulfur dioxide;

PM<sub>10</sub>: coarse particulate matter; PM<sub>2.5</sub>: fine particulate matter

**Table S6. Effect modification (interaction) associations between monitoring regions and temperature**

|             | Monitoring region |            |             | Chi Square | P       | Cramer V |
|-------------|-------------------|------------|-------------|------------|---------|----------|
|             | Northern          | Central    | Southern    |            |         |          |
| Temperature |                   |            |             | 682.2606   | <0.0001 | 0.4860   |
| <24.33 °C   | 327 (57.3)        | 494 (88.5) | 482 (27.4)  |            |         |          |
| ≥24.33 °C   | 244 (42.7)        | 64 (11.5)  | 1278 (72.6) |            |         |          |

Temperature groups were classified as being lower (<24.33 °C) and higher (≥ 24.33 °C) according to the mean temperature.

| Effect size statistic       | Values             | Interpretation of effect size |
|-----------------------------|--------------------|-------------------------------|
| Cramer's V for nominal data | .00 and under .10  | Negligible association        |
|                             | .10 and under .20  | Weak association              |
|                             | .20 and under .40  | Moderate association          |
|                             | .40 and under .60  | Relatively strong association |
|                             | .60 and under .80  | Strong association            |
|                             | .80 and under 1.00 | Very strong association       |

Cramer's V is commonly used to describe the magnitude of association between categorical variables for a contingency table larger than 2 x 2.

**Table S7. Descriptive statistics of air pollutants divided by turning point temperature in the four lung function groups and monitoring regions in the four lung function groups**

|                                                                 | Normal<br>Spirometry | Obstructive<br>Impairment | Restrictive<br>Impairment | Mixed<br>Impairment | P value |
|-----------------------------------------------------------------|----------------------|---------------------------|---------------------------|---------------------|---------|
| n                                                               | 1902                 | 733                       | 154                       | 100                 |         |
| Temperature categories                                          |                      |                           |                           |                     |         |
| PM <sub>10</sub> and PM <sub>2.5</sub>                          |                      |                           |                           |                     |         |
| <24.3 ( °C)                                                     | 851 (44.7)           | 304 (41.5)                | 65 (42.2)                 | 43 (43.0)           | 0.4797  |
| ≥24.3 ( °C)                                                     | 1051 (55.3)          | 429 (58.5)                | 89 (57.8)                 | 57 (57.0)           |         |
| CO, NO, NO <sub>2</sub> , NO <sub>x</sub> , and SO <sub>2</sub> |                      |                           |                           |                     |         |
| <24.6 ( °C)                                                     | 1283 (67.5)          | 412 (56.2)                | 85 (55.2)                 | 57 (57.0)           | <0.0001 |
| ≥24.6 ( °C)                                                     | 619 (32.5)           | 321 (43.8)                | 69 (44.8)                 | 43 (43.0)           |         |
| O <sub>3</sub>                                                  |                      |                           |                           |                     |         |
| <24.9 ( °C)                                                     | 1546 (81.3)          | 526 (71.8)                | 107 (69.5)                | 72 (72.0)           | <0.0001 |
| ≥24.9 ( °C)                                                     | 356 (18.7)           | 207 (28.2)                | 47 (30.5)                 | 28 (28.0)           |         |
| Monitoring area                                                 |                      |                           |                           |                     |         |
| Northern and Central Regions                                    | 702 (36.9)           | 321 (43.8)                | 57 (37.0)                 | 49 (49.0)           | 0.0018  |
| Southern Region                                                 | 1200 (63.1)          | 412 (56.2)                | 97 (63.0)                 | 51 (51.0)           |         |

PM<sub>10</sub>: coarse particulate matter; PM<sub>2.5</sub>: fine particulate matter; CO: Carbon monoxide; NO: Nitrogen monoxide; NO<sub>2</sub>: Nitrogen dioxide; NO<sub>x</sub>: Nitrogen oxides; O<sub>3</sub>: Ozone; SO<sub>2</sub>: Sulfur dioxide
